# Supplementary material for: EULAR recommendations for women's health and the management of family planning, assisted reproduction, pregnancy and menopause in patients with systemic lupus erythematosus and/or antiphospholipid syndrome
Source: PubMed Central journal article supplement — Ann Rheum Dis. 2017 Feb 17;76(3):476–85. doi: 10.1136/annrheumdis-2016-209770 (PMC5446003; doi:10.1136/annrheumdis-2016-209770), 2017-02-17
Supplement: annrheumdis-2016-209770supp003.pdf [file annrheumdis-2016-209770supp003.pdf]

**Supplementary Table S3.** Level of evidence (LoE) and grade of recommendation (GoR) rating scales

| LoE |                                                                                                                                                                                                                                                                                   |                                                                                                |
|-----|-----------------------------------------------------------------------------------------------------------------------------------------------------------------------------------------------------------------------------------------------------------------------------------|------------------------------------------------------------------------------------------------|
|     | Diagnostic/Prognostic studies                                                                                                                                                                                                                                                     | Intervention studies                                                                           |
| 1   | The available evidence is <b>strong</b> and includes consistent results from well-designed, well-conducted studies                                                                                                                                                                | At least one RCT or meta-analysis of RCTs                                                      |
| 2   | The available evidence is <b>sufficient</b> to determine effects, but confidence in the estimate is constrained by such factors as: the number, size, or quality of individual studies, inconsistency of findings across individual studies, limited generalizability of findings | Controlled (non-randomized) studies                                                            |
| 3   | The available evidence is <b>limited or insufficient</b> due to the limited number or size of studies, important flaws in study design or methods, inconsistency of findings across individual studies, gaps in the chain of evidence, lack of information on important outcomes. | Descriptive studies, such as comparative studies, correlation studies, or case-control studies |
| GoR |                                                                                                                                                                                                                                                                                   |                                                                                                |
| A   | Based on Level 1 evidence without concerns for the validity of the evidence                                                                                                                                                                                                       |                                                                                                |
| B   | Based on Level 1 evidence but with concerns about the validity of the evidence; or, extrapolated recommendations from Level 1 evidence; or, based on Level 2 evidence without concerns for the validity of the evidence                                                           |                                                                                                |
| C   | Based on Level 1 or 2 evidence but with concerns about the validity of the evidence; or, extrapolated recommendations from Level 2 evidence; or, based on Level 3 evidence without concerns for the validity of the evidence                                                      |                                                                                                |
| D   | Expert opinion; or, evidence from non-SLE/APS literature; or, based on Level 3 evidence but with concerns about the validity of the evidence                                                                                                                                      |                                                                                                |
