# Supplementary material for: EULAR recommendations for women's health and the management of family planning, assisted reproduction, pregnancy and menopause in patients with systemic lupus erythematosus and/or antiphospholipid syndrome
Source: PubMed Central journal article supplement — Ann Rheum Dis. 2017 Feb 17;76(3):476–85. doi: 10.1136/annrheumdis-2016-209770 (PMC5446003; doi:10.1136/annrheumdis-2016-209770), 2017-02-17
Supplement: annrheumdis-2016-209770supp004.pdf [file annrheumdis-2016-209770supp004.pdf]

**Supplementary Table S4. Assessment of disease activity during pregnancy in women with SLE**

|                                                                         |                                                                                                                                                                                                                                                                                                                                                                                                                                                                                                           |
|-------------------------------------------------------------------------|-----------------------------------------------------------------------------------------------------------------------------------------------------------------------------------------------------------------------------------------------------------------------------------------------------------------------------------------------------------------------------------------------------------------------------------------------------------------------------------------------------------|
| <p>Consider the physiologic changes that may occur during pregnancy</p> | <ul style="list-style-type: none"> <li>• Fatigue</li> <li>• Arthralgias, myalgias</li> <li>• Soft tissue edema</li> <li>• Melasma / facial and palmar erythema</li> <li>• Anemia due to haemodilution or iron deficiency</li> <li>• Gestational thrombocytopenia</li> <li>• Increase in ESR</li> <li>• Increase in serum C3/C4 concentrations</li> <li>• Low-grade proteinuria (UPCR &lt;0.3)</li> <li>• Increase in GFR (reduced blood urea and serum creatinine levels)</li> </ul>                      |
| <p>Consider possible pregnancy-related complications</p>                | <ul style="list-style-type: none"> <li>• Pre-eclampsia</li> <li>• Infection</li> </ul>                                                                                                                                                                                                                                                                                                                                                                                                                    |
| <p>Assessment of SLE activity</p>                                       | <ul style="list-style-type: none"> <li>• Physician global assessment (scale 0–3) in conjunction with at least one of the validated activity instruments</li> <li>• Pregnancy-specific SLE activity indices (SLEPDAI, LAI-P, BILAG2004-P, modified SELENA-SLEDAI flare index) may be preferred</li> <li>• Monitoring frequency: on every visit (every 2 to 8 weeks)</li> </ul>                                                                                                                             |
| <p>Assessment of renal function</p>                                     | <ul style="list-style-type: none"> <li>• Blood urea and serum creatinine levels, urinalysis, 24-hr or spot UPCR (if urine dipstick positive)</li> <li>• Monitoring frequency: every 4 to 8 weeks, or in suspected SLE flare</li> </ul>                                                                                                                                                                                                                                                                    |
| <p>Serological markers (serum C3/C4, anti-dsDNA titres)</p>             | <ul style="list-style-type: none"> <li>• Serial changes (i.e., declining serum C3/C4 levels [especially by ≥25%, even within the normal range] and/or increasing anti-dsDNA titres) have greater prognostic value</li> <li>• Increased predictive value when interpreted in the context of clinical disease activity</li> <li>• No evidence for benefit of pre-emptive treatment of isolated serologic activity</li> <li>• Monitoring frequency: every 4 to 8 weeks, or in suspected SLE flare</li> </ul> |
